# Supplementary material for: A R2R3-MYB Transcription Factor, VvMYBC2L2, Functions as a Transcriptional Repressor of Anthocyanin Biosynthesis in Grapevine (Vitis vinifera L.)
Source: PubMed Central journal article supplement (PMC6337365; doi:10.3390/molecules24010092), 2018-12-27
Supplement: molecules-24-00092-s001.pdf [file molecules-24-00092-s001.pdf]

## Supplementary data

Table S1 Sequence of the primers in the experiment for qPCR.

| Gene name        | Forward Primer 5' → 3'   | Reverse Primer 5' → 3'    |
|------------------|--------------------------|---------------------------|
| <i>VvPAL1</i>    | aagagggtgagagcgcaagaga   | actgagacaatccagaagaggg    |
| <i>VvDFR1</i>    | gaagctgacagattgggggtt    | aggtttctcatgtgaaggggga    |
| <i>VvLAR1</i>    | tgtgggaaaagaagattgggag   | tttatgaaaatgctgctgtga     |
| <i>VvLDOX1</i>   | aaaggaaagtgggtggatggaa   | tgtggaggatgaaggtgagagc    |
| <i>VvUFGT1</i>   | gatatggcagcagagatgggg    | tgcgtgagaagagcgagtta      |
| <i>VvMYBC2L2</i> | tgagaagaaaagcacaagaaaaga | gactgaggaagtgagctccagcaac |
| <i>VvActin</i>   | cctcaacccaaggccaacaga    | accatcaccagaatccagcaca    |
| <i>NtCHI</i>     | gtcaggccattgaaaagctc     | ctaatcgtcaatgccccaac      |
| <i>NtCHS</i>     | ttgttcgagcttctctctgc     | agcccaggaacatctttgag      |
| <i>NtFLS</i>     | gaacttgaagggaaaaagggg    | tccctgtaggaggaggatt       |
| <i>NtDFR</i>     | aaccaacagtcaggggaatg     | ttggacatcgacagttccag      |
| <i>NtLAR</i>     | tcaaggtcctttacgccatc     | acgaacctgcttctctttgg      |
| <i>NtANR1</i>    | cattgacttcccaaagc        | attgggctttgagttgtgc       |
| <i>NtANR2</i>    | tgtcccactgggatgata       | tgcacctatactctgttagtggc   |
| <i>NtANS</i>     | tggcgttgaagctcactag      | ggaattaggcacacactttgc     |
| <i>NtUFGT</i>    | gagtgacattggatgccttt     | ccagctccattaggtccttg      |
| <i>NtAn1a</i>    | accattctcgaacaccgaag     | tgctagggcacaatgtgaag      |
| <i>NtAn1b</i>    | cttgaacacttctcaaaccga    | tgctagggcacaatgtgaag      |
| <i>NtActin</i>   | aatggaactggaatggtcaaggc  | tgccagatcttccatgcatccca   |
